# Supplementary material for: Association between metabolically healthy obesity and risk of atrial fibrillation: taking physical activity into consideration
Source: PubMed Central journal article supplement (PMC9563485; doi:10.1186/s12933-022-01644-z), 2022-10-13

## Supplemental Contents

|                                                                                                                                                                                                                                        |    |
|----------------------------------------------------------------------------------------------------------------------------------------------------------------------------------------------------------------------------------------|----|
| <b>STable 1.</b> Identification of baseline and incident atrial fibrillation in this study .....                                                                                                                                       | 2  |
| <b>STable 2.</b> Independent associations of metabolic status and physical activity with atrial fibrillation from the model adjusted for age and sex.....                                                                              | 3  |
| <b>STable 3.</b> Number of atrial fibrillation events and the joint associations in different groups defined by metabolic status and physical activity .....                                                                           | 4  |
| <b>STable 4.</b> Subgroup analyses for the independent and mutually adjusted associations of metabolic status and physical activity with incident atrial fibrillation risk* .....                                                      | 5  |
| <b>STable 5.</b> Associations between physical activity and incident atrial fibrillation risk stratified by different metabolic status* .....                                                                                          | 7  |
| <b>STable 6.</b> Effect modification of metabolic status and physical activity with incident atrial fibrillation risk where metabolic status is the exposure of interest and physical activity is the potential effect modifier* ..... | 8  |
| <b>STable 7.</b> Joint associations of metabolic status and physical activity with incident atrial fibrillation risk using multiple imputation technique for missing data*.....                                                        | 9  |
| <b>STable 8.</b> Joint associations of metabolic status and physical activity with incident atrial fibrillation risk using different definition of metabolic status* .....                                                             | 10 |
| <b>STable 9.</b> Joint associations of metabolic status and physical activity with incident atrial fibrillation risk by further adjusted for other variables*.....                                                                     | 11 |
| <b>SFigure 1.</b> Flow diagram showing participant selection for this study .....                                                                                                                                                      | 12 |
| <b>SFigure 2.</b> Independent associations of all other variables with incident atrial fibrillation risk from the fully adjusted model.....                                                                                            | 13 |

**STable 1.** Identification of baseline and incident atrial fibrillation in this study

| <b>Data fields</b> | <b>Fields' names</b>                            | <b>Data code</b>                                           |
|--------------------|-------------------------------------------------|------------------------------------------------------------|
| 20002 <sup>1</sup> | Non-cancer illness codes, self-reported         | 1471, 1483                                                 |
| 41270 <sup>2</sup> | Diagnoses - ICD10                               | I48, I480, I481, I482, I483, I484, I489                    |
| 41271 <sup>2</sup> | Diagnoses – ICD9                                | 4273                                                       |
| 40001 <sup>3</sup> | Underlying (primary) cause of death: ICD10      | I48, I480, I481, I482, I483, I484, I489                    |
| 40002 <sup>3</sup> | Contributory (secondary) causes of death: ICD10 | I48, I480, I481, I482, I483, I484, I489                    |
| 20004 <sup>1</sup> | Operation, self-reported                        | 1524, 1553                                                 |
| 41272 <sup>2</sup> | Operative procedure codes                       | K223, K571, K575, K621, K622, K623, K624, K625, X501, X502 |

ICD = international classification of diseases

<sup>1</sup> for baseline AF identification only

<sup>2</sup> for both baseline and incident AF identification

<sup>3</sup> for both incident AF and AF mortality identification

**STable 2.** Independent associations of metabolic status and physical activity with atrial fibrillation from the model adjusted for age and sex

|                          | <b>AF</b>                   | <b>AF death</b>             |
|--------------------------|-----------------------------|-----------------------------|
| <b>Exposure</b>          | HR (95% CI), p-value        | HR (95% CI), p-value        |
| <i>Metabolic status</i>  |                             |                             |
| MUO                      | Ref                         | Ref                         |
| MHO                      | 0.59 (0.54, 0.65), p < 0.01 | 0.29 (0.12, 0.71), p < 0.01 |
| <i>Physical activity</i> |                             |                             |
| No MVPA                  | Ref                         | Ref                         |
| low                      | 0.84 (0.77, 0.92), p < 0.01 | 0.65 (0.37, 1.16), p = 0.15 |
| medium                   | 0.78 (0.70, 0.86), p < 0.01 | 0.65 (0.33, 1.27), p = 0.21 |
| high                     | 0.79 (0.73, 0.86), p < 0.01 | 0.55 (0.32, 0.94), p = 0.03 |

AF, atrial fibrillation; MUO, metabolically unhealthy obesity; MHO, metabolically healthy obesity; MVPA, moderate-to-vigorous physical activity; HR, hazard ratio; CI, confidence interval.

**STable 3.** Number of atrial fibrillation events and the joint associations in different groups defined by metabolic status and physical activity

| <b>Metabolic status, physical activity</b> | <b>No. With/Without Events</b> | <b>HR (95% CI), p-value</b> |
|--------------------------------------------|--------------------------------|-----------------------------|
| MUO, no MVPA (n = 14,377)                  | 658/10,664                     | Ref                         |
| MUO, low PA (n = 19,894)                   | 801/15,694                     | 0.91 (0.82, 1.01), p = 0.07 |
| MUO, medium PA (n = 11,009)                | 412/8,601                      | 0.84 (0.74, 0.95), p < 0.01 |
| MUO, high PA (n = 25,253)                  | 1,033/19,668                   | 0.87 (0.78, 0.96), p < 0.01 |
| MHO, no MVPA (n = 3,894)                   | 57/2,936                       | 0.59 (0.45, 0.77), p < 0.01 |
| MHO, low PA (n = 6,366)                    | 86/5,033                       | 0.56 (0.45, 0.70), p < 0.01 |
| MHO, medium PA (n = 3,430)                 | 44/2,716                       | 0.53 (0.39, 0.72), p < 0.01 |
| MHO, high PA (n = 7,763)                   | 133/6,176                      | 0.61 (0.51, 0.74), p < 0.01 |
| Overall (n = 91,986)                       | 3,224/71,488                   | -                           |

MUO, metabolically unhealthy obesity; MHO, metabolically healthy obesity; MVPA, moderate-to-vigorous physical activity.

**STable 4.** Subgroup analyses for the independent and mutually adjusted associations of metabolic status and physical activity with incident atrial fibrillation risk\*

|                          | Sex                                    |                             |                                        |                             | Age                                    |                             |                                        |                             |
|--------------------------|----------------------------------------|-----------------------------|----------------------------------------|-----------------------------|----------------------------------------|-----------------------------|----------------------------------------|-----------------------------|
|                          | Male                                   |                             | Female                                 |                             | < 65 years                             |                             | ≥ 65 years                             |                             |
|                          | No. of cases/No. of total participants | HR (95% CI), p-value        | No. of cases/No. of total participants | HR (95% CI), p-value        | No. of cases/No. of total participants | HR (95% CI), p-value        | No. of cases/No. of total participants | HR (95% CI), p-value        |
| <i>Metabolic status</i>  |                                        |                             |                                        |                             |                                        |                             |                                        |                             |
| MUO                      | 2,023/29,885                           | Ref                         | 881/24,742                             | Ref                         | 1,797/43,622                           | Ref                         | 1,107/11,005                           | Ref                         |
| MHO                      | 184/6,776                              | 0.65 (0.56, 0.76), p < 0.01 | 136/10,085                             | 0.66 (0.55, 0.79), p < 0.01 | 248/15,660                             | 0.52 (0.45, 0.60), p < 0.01 | 72/1,201                               | 0.67 (0.52, 0.85), p < 0.01 |
| <i>Physical activity</i> |                                        |                             |                                        |                             |                                        |                             |                                        |                             |
| No MVPA                  | 468/6,722                              | Ref                         | 247/6,878                              | Ref                         | 463/11,445                             | Ref                         | 252/2,155                              | Ref                         |
| Low                      | 617/9,918                              | 0.98 (0.86, 1.10), p = 0.69 | 270/10,809                             | 0.79 (0.66, 0.94), p < 0.01 | 559/17,544                             | 0.89 (0.78, 1.00), p = 0.06 | 328/3,183                              | 0.93 (0.79, 1.10), p = 0.40 |
| Medium                   | 317/5,515                              | 0.90 (0.78, 1.04), p = 0.16 | 139/5,802                              | 0.72 (0.59, 0.89), p < 0.01 | 291/9,397                              | 0.85 (0.74, 0.99), p = 0.04 | 165/1,920                              | 0.77 (0.63, 0.94), p < 0.01 |

|      |            |                             |            |                             |            |                             |           |                             |
|------|------------|-----------------------------|------------|-----------------------------|------------|-----------------------------|-----------|-----------------------------|
| High | 805/14,506 | 0.87 (0.78, 0.98), p = 0.02 | 361/11,338 | 0.89 (0.76, 1.06), p = 0.18 | 732/20,896 | 0.90 (0.80, 1.02), p = 0.10 | 434/4,948 | 0.79 (0.67, 0.92), p < 0.01 |
|------|------------|-----------------------------|------------|-----------------------------|------------|-----------------------------|-----------|-----------------------------|

MUO, metabolically unhealthy obesity; MHO, metabolically healthy obesity; MVPA, moderate-to-vigorous physical activity; HR, hazard ratio; CI, confidence interval.

\* Models adjusted for age, sex, body mass index, smoking status, alcohol drinking status, income, sleep scores, mental health issues, employment status, socioeconomic status (TDI: Townsend deprivation index), vegetable and fruit intake, sedentary behavior, cardiovascular disease and mutually adjusted for physical activity or metabolic status as appropriate.

**STable 5.** Associations between physical activity and incident atrial fibrillation risk stratified by different metabolic status\*

| Physical activity | MHO                            | MUO                            |                                |                                |
|-------------------|--------------------------------|--------------------------------|--------------------------------|--------------------------------|
|                   |                                | Mild                           | Moderate                       | Severe                         |
| No MVPA           | Ref                            | Ref                            | Ref                            | Ref                            |
| Low               | 0.95 (0.68, 1.33),<br>p = 0.76 | 0.90 (0.76, 1.07),<br>p = 0.23 | 0.96 (0.81, 1.14),<br>p = 0.63 | 0.93 (0.75, 1.16),<br>p = 0.52 |
| Medium            | 0.88 (0.59, 1.31),<br>p = 0.53 | 0.97 (0.80, 1.17),<br>p = 0.73 | 0.83 (0.67, 1.02),<br>p = 0.07 | 0.70 (0.52, 0.94),<br>p = 0.02 |
| High              | 1.01 (0.73, 1.39),<br>p = 0.98 | 1.04 (0.89, 1.21),<br>p = 0.65 | 0.84 (0.71, 1.00),<br>p = 0.04 | 0.70 (0.55, 0.88),<br>p < 0.01 |

AF, atrial fibrillation; MUO, metabolically unhealthy obesity; MHO, metabolically healthy obesity; MVPA, moderate-to-vigorous physical activity; PA, physical activity; HR, hazard ratio; CI, confidence interval.

\* Metabolically unhealthy status were categorized into: **Mild** (only one of the metabolic disorders), **moderate** (two of the metabolic disorders), **severe** (all of the metabolic disorders). Metabolic disorders: hypertension, hypercholesterolemia, and diabetes.

Models were adjusted for age, sex, body mass index, smoking status, alcohol drinking status, income, sleep scores, mental health issues, employment status, socioeconomic status (TDI: Townsend deprivation index), vegetable and fruit intake, sedentary behavior, and cardiovascular disease.

**STable 6.** Effect modification of metabolic status and physical activity with incident atrial fibrillation risk where metabolic status is the exposure of interest and physical activity is the potential effect modifier\*

|          | <b>MHO</b>                                |                             | <b>MUO</b>                                |                             | HR (95% CI) for MUO<br>within Strata of PA |
|----------|-------------------------------------------|-----------------------------|-------------------------------------------|-----------------------------|--------------------------------------------|
|          | No. of cases/No. of<br>total participants | HR (95% CI), p-value        | No. of cases/No. of<br>total participants | HR (95% CI), p-value        |                                            |
| Any MVPA | 658/10,664                                | Ref                         | 2,246/43,963                              | 1.52 (1.33, 1.73), p < 0.01 | 1.50 (1.31, 1.71), p < 0.01                |
| No MVPA  | 57/2,936                                  | 1.02 (0.76, 1.36), p = 0.91 | 263/13,925                                | 1.73 (1.49, 2.00), p < 0.01 | 1.72 (1.31, 2.27), p < 0.01                |

MHO, metabolically healthy obesity; MUO, metabolically unhealthy obesity; PA, physical activity; MVPA, moderate-to-vigorous physical activity; HR, hazard ratio; CI, confidence interval.

\* Measure of effect modification on additive scale: RERI (95% CI) = 0.20 (-0.12, 0.51), AP (95% CI) = 0.11 (-0.18, 0.30), and S = 1.37 (0.74, 2.53).

Measure of effect modification on multiplicative scale: ratio of HRs (95% CI) = 1.12 (0.65, 1.59)

Models were adjusted for age, sex, body mass index, smoking status, alcohol drinking status, income, sleep scores, mental health issues, employment status, Townsend deprivation index, vegetable and fruit intake, sedentary behavior, and cardiovascular disease.



**STable 7.** Joint associations of metabolic status and physical activity with incident atrial fibrillation risk using multiple imputation technique for missing data\*

| <b>Metabolic status &amp; Physical activity</b> | <b>HR (95% CI), p-value</b> |
|-------------------------------------------------|-----------------------------|
| MUO & No MVPA                                   | Ref                         |
| MUO & Low PA                                    | 0.93 (0.85, 1.02), p = 0.13 |
| MUO & Medium PA                                 | 0.89 (0.79, 0.99), p = 0.04 |
| MUO & High PA                                   | 0.90 (0.82, 0.99), p = 0.03 |
| MHO & No MVPA                                   | 0.60 (0.47, 0.77), p < 0.01 |
| MHO & Low PA                                    | 0.59 (0.48, 0.73), p < 0.01 |
| MHO & Medium PA                                 | 0.59 (0.45, 0.77), p < 0.01 |
| MHO & High PA                                   | 0.64 (0.54, 0.76), p < 0.01 |

MUO, metabolically unhealthy obesity; MHO, metabolically healthy obesity; MVPA, moderate-to-vigorous physical activity; PA, physical activity; HR, hazard ratio; CI, confidence interval.

\* Models were adjusted for age, sex, body mass index, smoking status, alcohol drinking status, income, sleep scores, mental health issues, employment status, socioeconomic status (TDI: Townsend deprivation index), vegetable and fruit intake, sedentary behavior, and cardiovascular disease.

**STable 8.** Joint associations of metabolic status and physical activity with incident atrial fibrillation risk using different definition of metabolic status\*

| <b>Metabolic status &amp; Physical activity</b> | <b>HR (95% CI), p-value</b> |
|-------------------------------------------------|-----------------------------|
| MUO & No MVPA                                   | Ref                         |
| MUO & Low PA                                    | 0.93 (0.83, 1.04), p = 0.19 |
| MUO & Medium PA                                 | 0.86 (0.75, 0.98), p = 0.02 |
| MUO & High PA                                   | 0.86 (0.77, 0.96), p < 0.01 |
| MHO & No MVPA                                   | 0.91 (0.75, 1.11), p = 0.36 |
| MHO & Low PA                                    | 0.77 (0.65, 0.91), p < 0.01 |
| MHO & Medium PA                                 | 0.71 (0.57, 0.89), p < 0.01 |
| MHO & High PA                                   | 0.86 (0.74, 0.99), p = 0.03 |

MUO, metabolically unhealthy obesity; MHO, metabolically healthy obesity; MVPA, moderate-to-vigorous physical activity; PA, physical activity; HR, hazard ratio; CI, confidence interval.

\* Models were adjusted for age, sex, body mass index, smoking status, alcohol drinking status, income, sleep scores, mental health issues, employment status, socioeconomic status (TDI: Townsend deprivation index), vegetable and fruit intake, sedentary behavior, and cardiovascular disease.

**STable 9.** Joint associations of metabolic status and physical activity with incident atrial fibrillation risk by further adjusted for other variables\*

| <b>Metabolic status &amp; Physical activity</b> | <b>HR (95% CI), p-value</b> |
|-------------------------------------------------|-----------------------------|
| MUO & No MVPA                                   | Ref                         |
| MUO & Low PA                                    | 0.88 (0.79, 0.98), p = 0.02 |
| MUO & Medium PA                                 | 0.81 (0.71, 0.92), p < 0.01 |
| MUO & High PA                                   | 0.82 (0.74, 0.91), p < 0.01 |
| MHO & No MVPA                                   | 0.55 (0.41, 0.73), p < 0.01 |
| MHO & Low PA                                    | 0.46 (0.36, 0.59), p < 0.01 |
| MHO & Medium PA                                 | 0.48 (0.35, 0.66), p < 0.01 |
| MHO & High PA                                   | 0.56 (0.46, 0.68), p < 0.01 |

MUO, metabolically unhealthy obesity; MHO, metabolically healthy obesity; MVPA, moderate-to-vigorous physical activity; PA, physical activity; HR, hazard ratio; CI, confidence interval.

\* Models were adjusted for age, sex, height, C-reactive protein, white blood cell counts, smoking status, alcohol drinking status, income, sleep scores, mental health issues, employment status, socioeconomic status (TDI: Townsend deprivation index), vegetable and fruit intake, sedentary behavior, and cardiovascular disease.

**Figure 1.** Flow diagram showing participant selection for this study

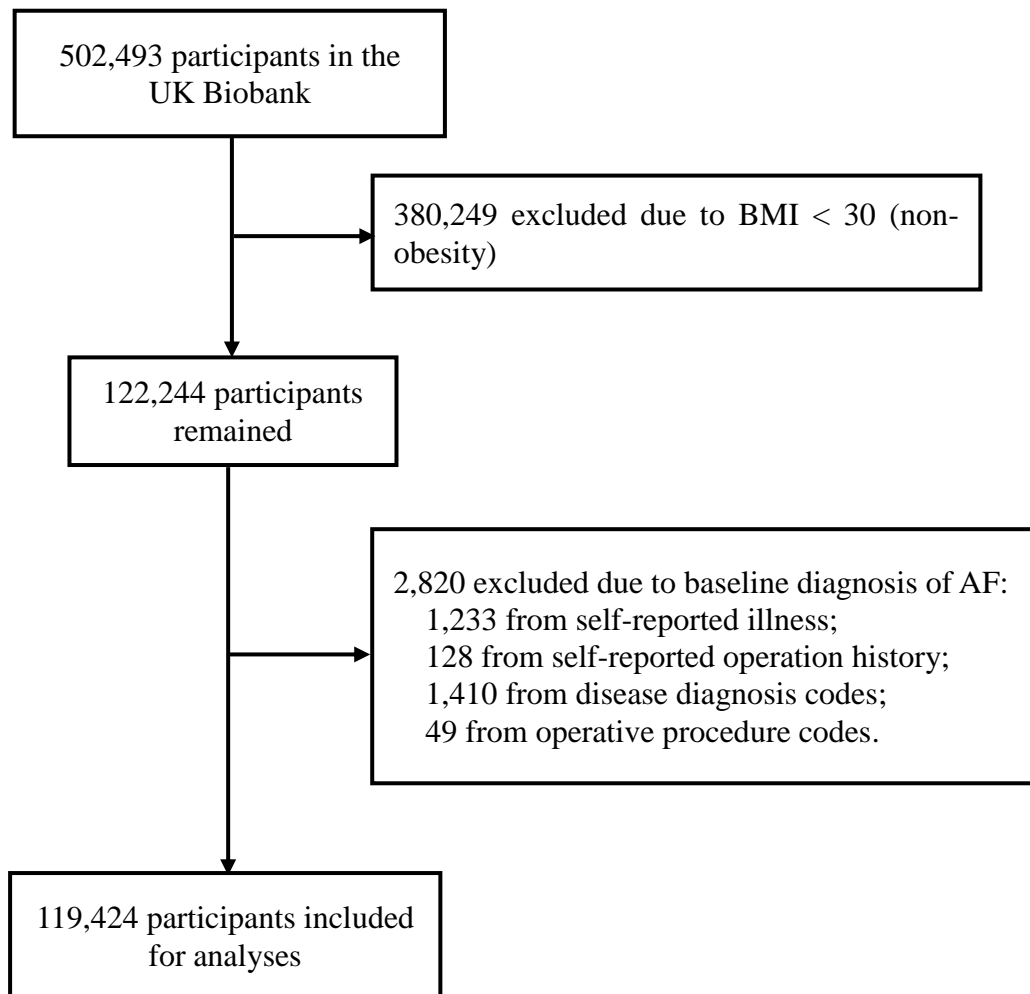

**Figure 2.** Independent associations of all other variables with incident atrial fibrillation risk from the fully adjusted model

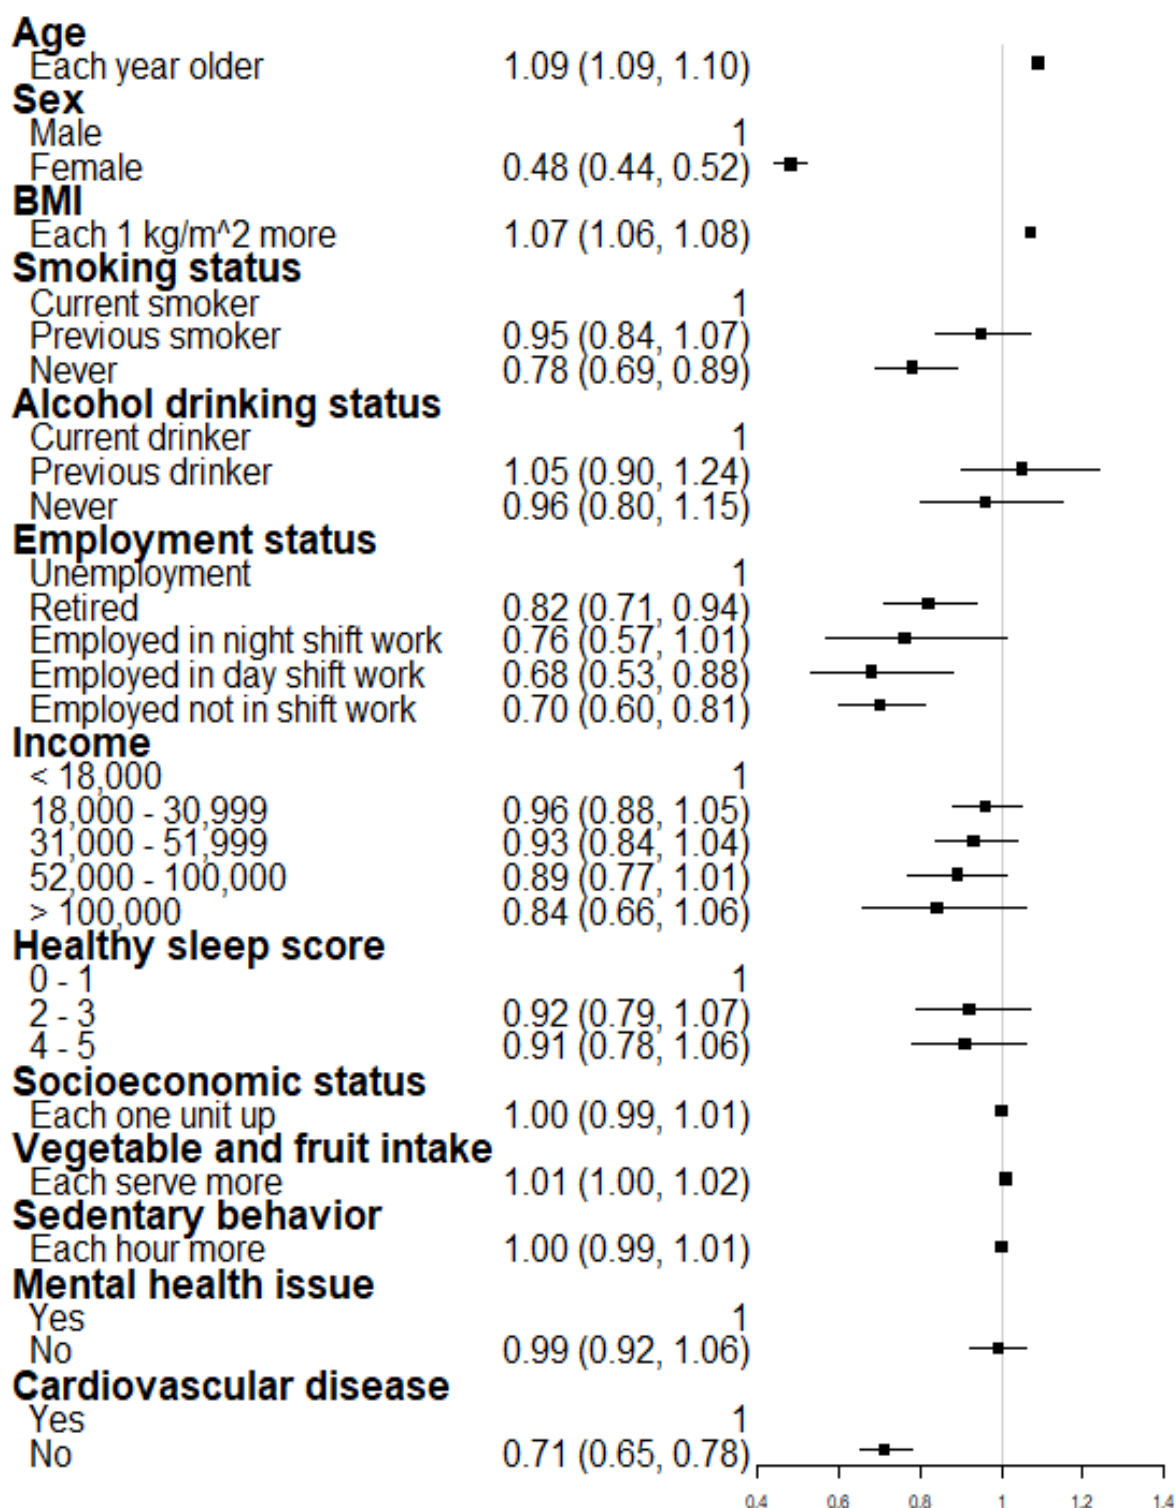

Supplement: 12933_2022_1644_MOESM1_ESM.pdf [file 12933_2022_1644_MOESM1_ESM.pdf]
